# Supplementary material for: Targeting the CD47/thrombospondin-1 signaling axis regulates immune cell bioenergetics in the tumor microenvironment to potentiate antitumor immune response
Source: PubMed Central journal article supplement — J Immunother Cancer. 2022 Nov 23;10(11):e004712. doi: 10.1136/jitc-2022-004712 (PMC9685258; doi:10.1136/jitc-2022-004712), 2022-11-23
Supplement: jitc-2022-004712supp002.pdf [file jitc-2022-004712supp002.pdf]

### **Supplementary Figure Legends**

**Supplementary Fig. 1A1B-CD47 antisense morpholino reduces tumor burden in the YUMM1.7 melanoma model (A)** Tumor volume was determined throughout the study ( $LW^{2/2}$ ). (\* $p < 0.05$ ,  $n = 5-6$ /group). **(B) Intratumoral cytotoxic (yellow cells due to co-localization of CD3+ (red, APC) and CD8+ (green, FITC)) T cells**

**Supplementary Fig. 2A-B- B16 melanoma cells express the Pmel-1 antigen.** B16 cell protein expression of the **(A)** Pmel-1 antigen with the **(B)** gp100 peptide fragment.

**Supplementary Fig. 2C- CD47 antisense morpholino decreases protein expression of B16 melanoma tumors.** Mice treated with CD47 morpholino (CD47(-)) have decreased CD47 protein expression within B16 melanoma tumors.

**Supplementary Fig. 2D- CD47 antisense morpholino decreases protein expression of Pmel-1 CD8+ T cells.** Pmel-1 CD8+ T cells treated with CD47 morpholino (CD47(-)) have decreased CD47 protein expression.

**Supplementary Fig. 2E- Gating strategy for flow cytometry on Pmel-1 CD8+ T cells.** To determine the differentiation of Pmel-1 CD8+ T cells, splenocytes were stained and gated based on cellular viability, CD3, and CD8 expression.

**Supplementary Fig. 2F- Control morpholino doesn't alter CD8+ T cell effector function.** Pmel-1 CD8+ T cell cytotoxic capabilities were unchanged when treated with CTRL (-) compared to control.

**Supplementary Fig. 2G- Thrombospondin-1 doesn't alter cancer cell proliferation.** The proliferation of B16 melanoma cells treated with 10 nM TSP1 is unchanged from the control.

**Supplementary Fig. 3A- scRNA-seq immune cell population clusters.** Data derived from scRNA-seq using the 10x genomics system was clustered into the following immune cell populations: NK cells (NKG7+, CD56+), T lymphocytes (CD3+, CD28+), B cells (CD19+, CD40+) and monocytes (CD68+, CD163+).

**Supplementary Fig. 3B- Gating strategy for flow cytometry on human melanoma patient PBMC.** To determine the percent of CD47 expressing T cells, human melanoma patient PBMC were stained and gated based on cellular viability, CD3, CD8, and CD47 expression.

**Supplementary Fig. 3C- PBMC expressing PD-1 on CD8+ T cells.** To determine the percent of PD-1 expressing T cells, human melanoma patient PBMC were stained and gated based on cellular viability, CD3, CD8, and PD-1 expression.

**Supplementary Fig. 3D- PBMC co-expressing PD-1 and CD47 on CD8+ T cells.** PBMCs were stained and gated based on cellular viability, CD3, CD8, and PD-1 and CD47 co-expression.
