# Supplementary figures and images for: Targeting the CD47/thrombospondin-1 signaling axis regulates immune cell bioenergetics in the tumor microenvironment to potentiate antitumor immune response
Source: PubMed Central journal article supplement — J Immunother Cancer. 2022 Nov 23;10(11):e004712. doi: 10.1136/jitc-2022-004712 (PMC9685258; doi:10.1136/jitc-2022-004712), 2022-11-23

## Supplementary Figure 1

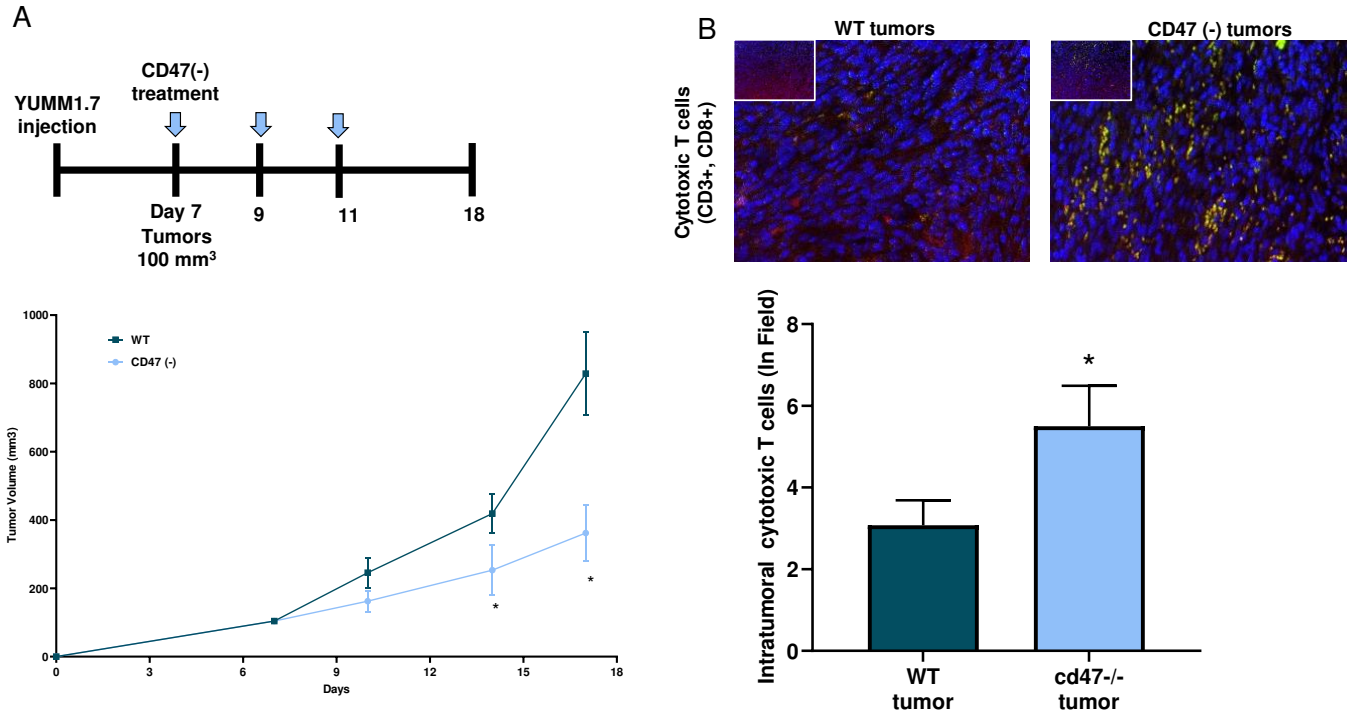

## Supplementary Figure 2

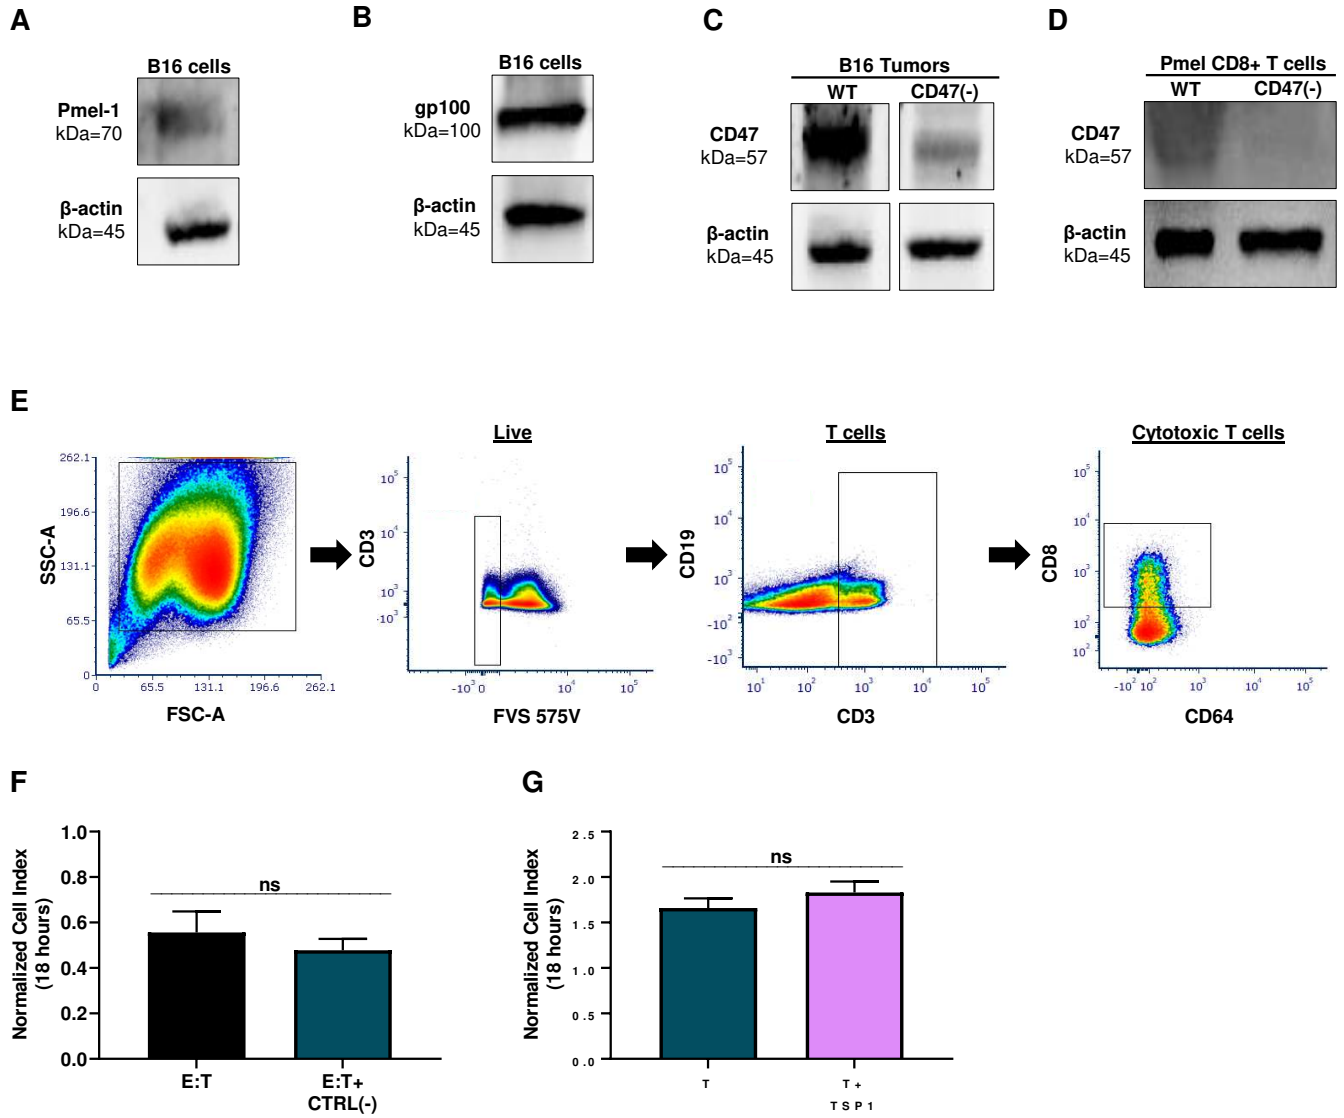

## Supplementary Figure 3

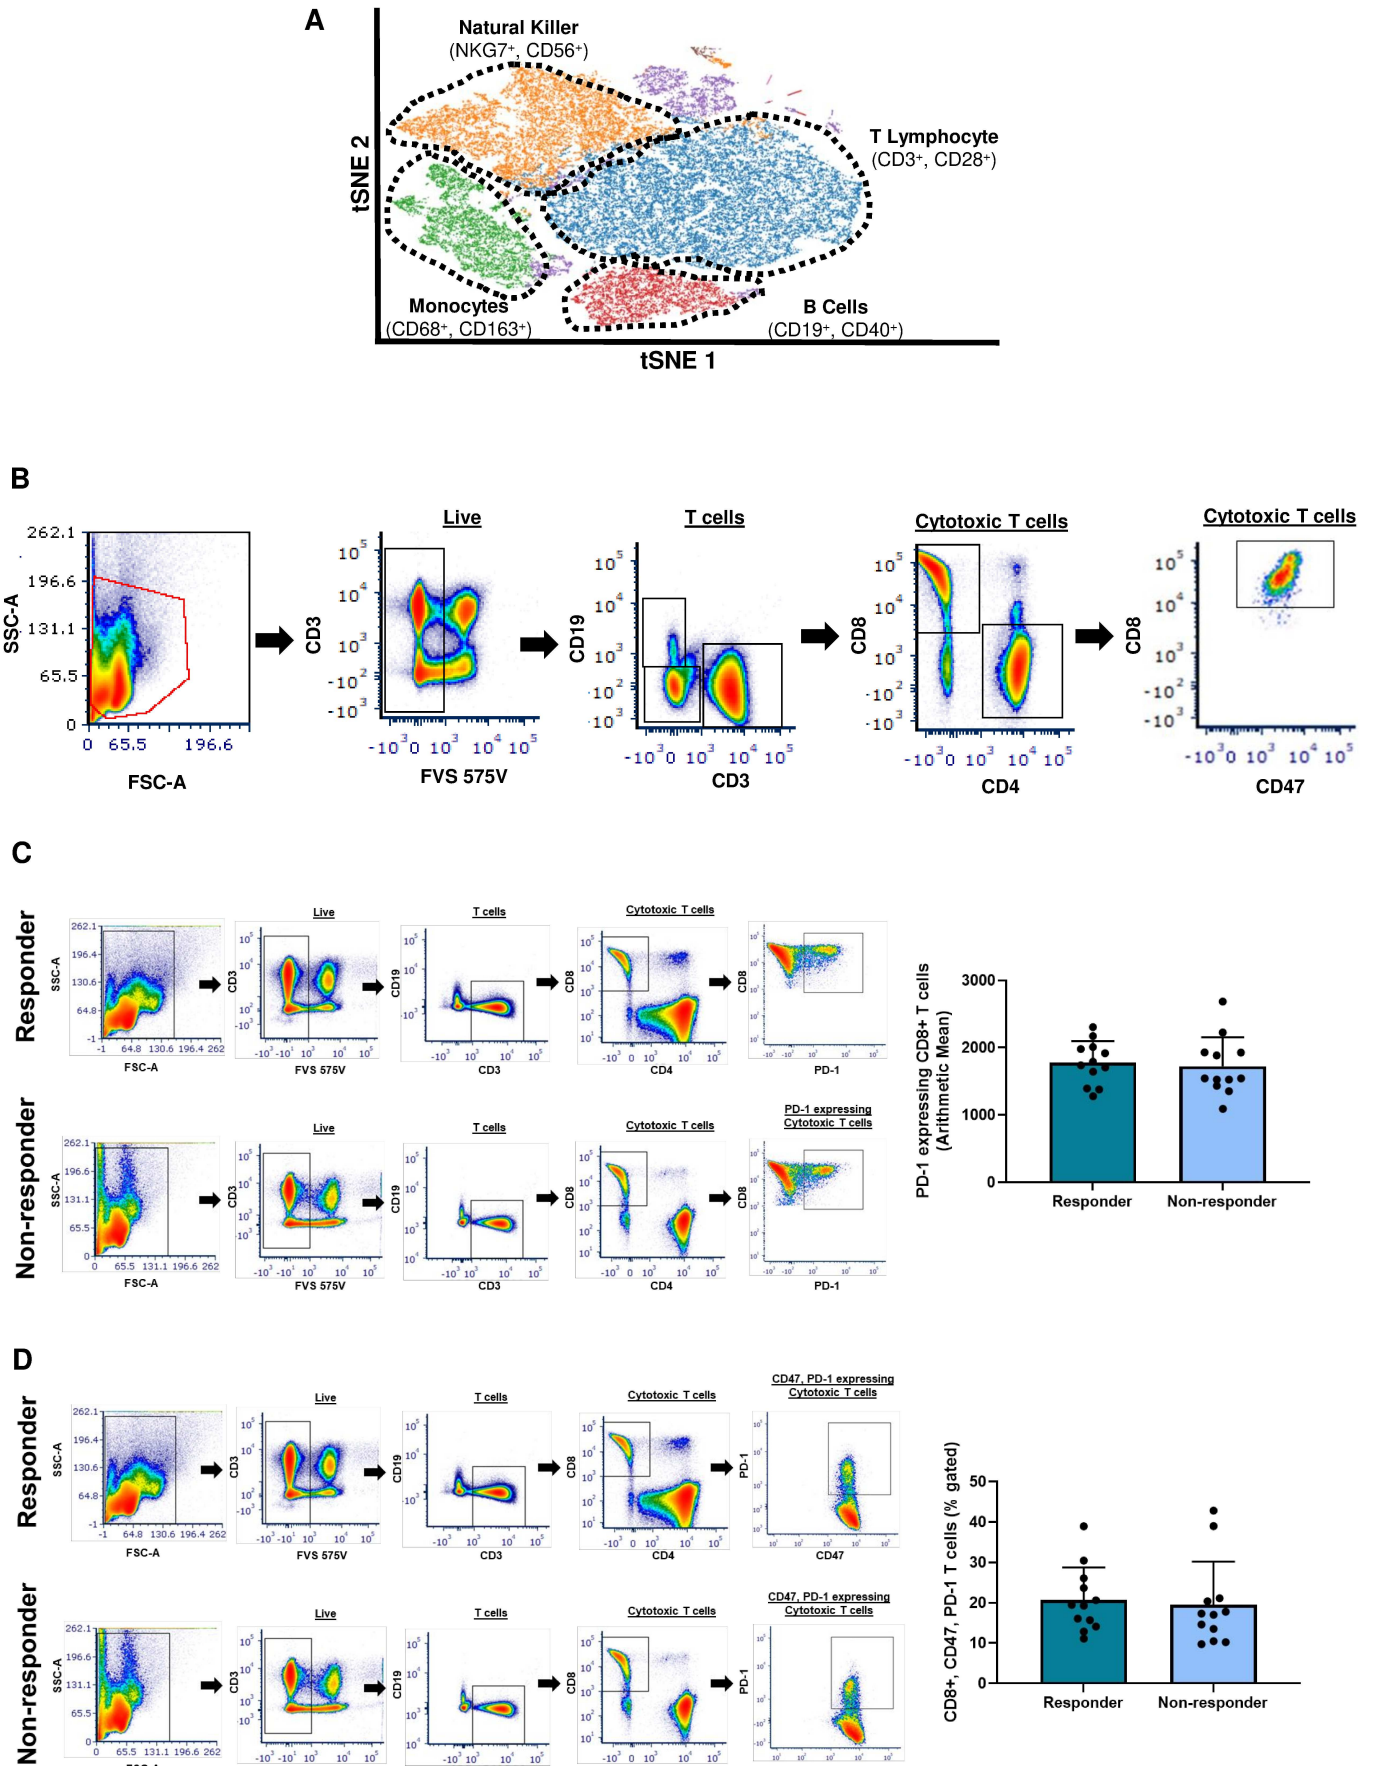

Supplement: jitc-2022-004712supp001.pdf [file jitc-2022-004712supp001.pdf]
